# Supplementary material
Source: PubMed Central journal article supplement (PMC1413884)

**A**

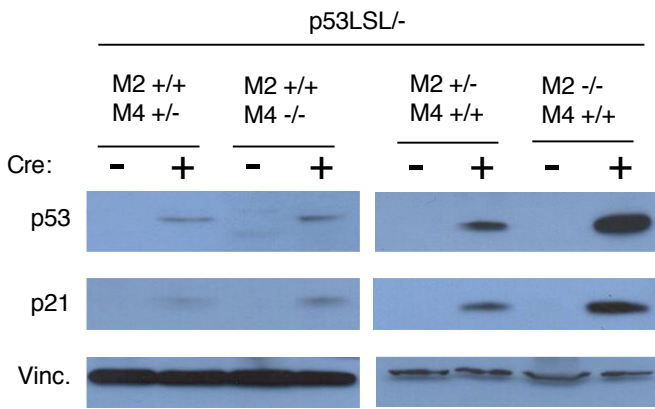

**D**

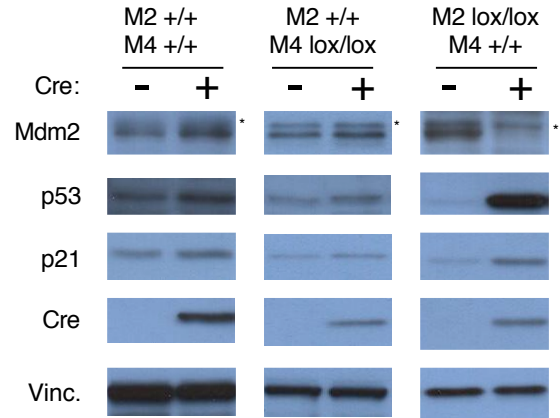

**B**

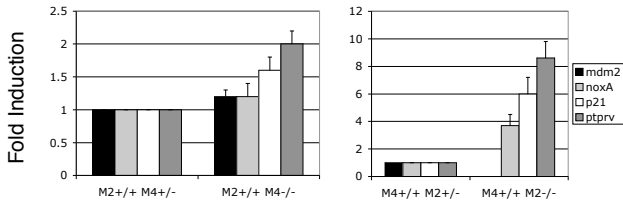

**C**

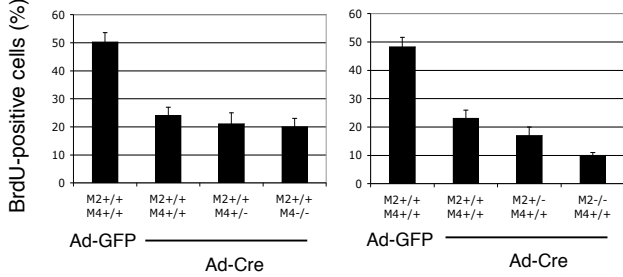

**E**

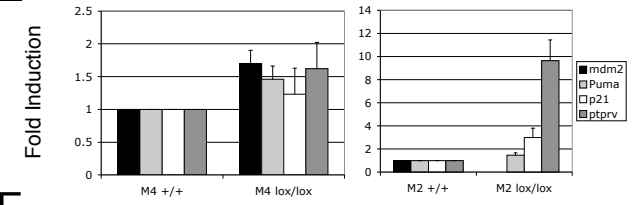

**F**

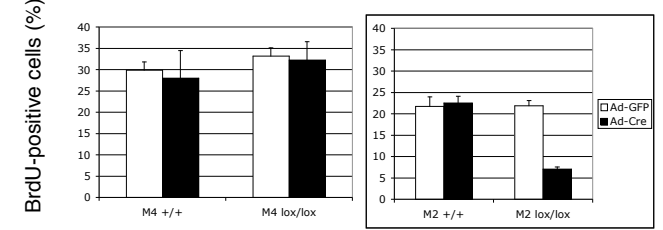

Supplement: pnas_0508476103_1.pdf [file pnas_0508476103_1.pdf]

# A

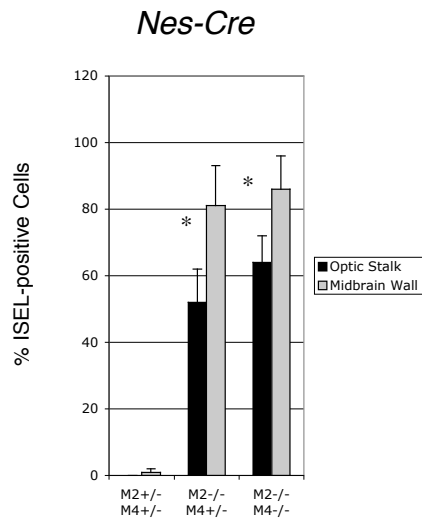

# B

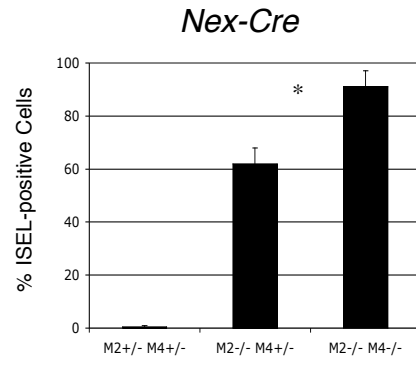

Supplement: pnas_0508476103_2.pdf [file pnas_0508476103_2.pdf]
